# Supplementary material for: Allelic Differentiation at the E1/Ghd7 Locus Has Allowed Expansion of Rice Cultivation Area
Source: PubMed Central journal article supplement (PMC6963527; doi:10.3390/plants8120550), 2019-11-28
Supplement: plants-08-00550-s001.pdf [file plants-08-00550-s001.pdf]

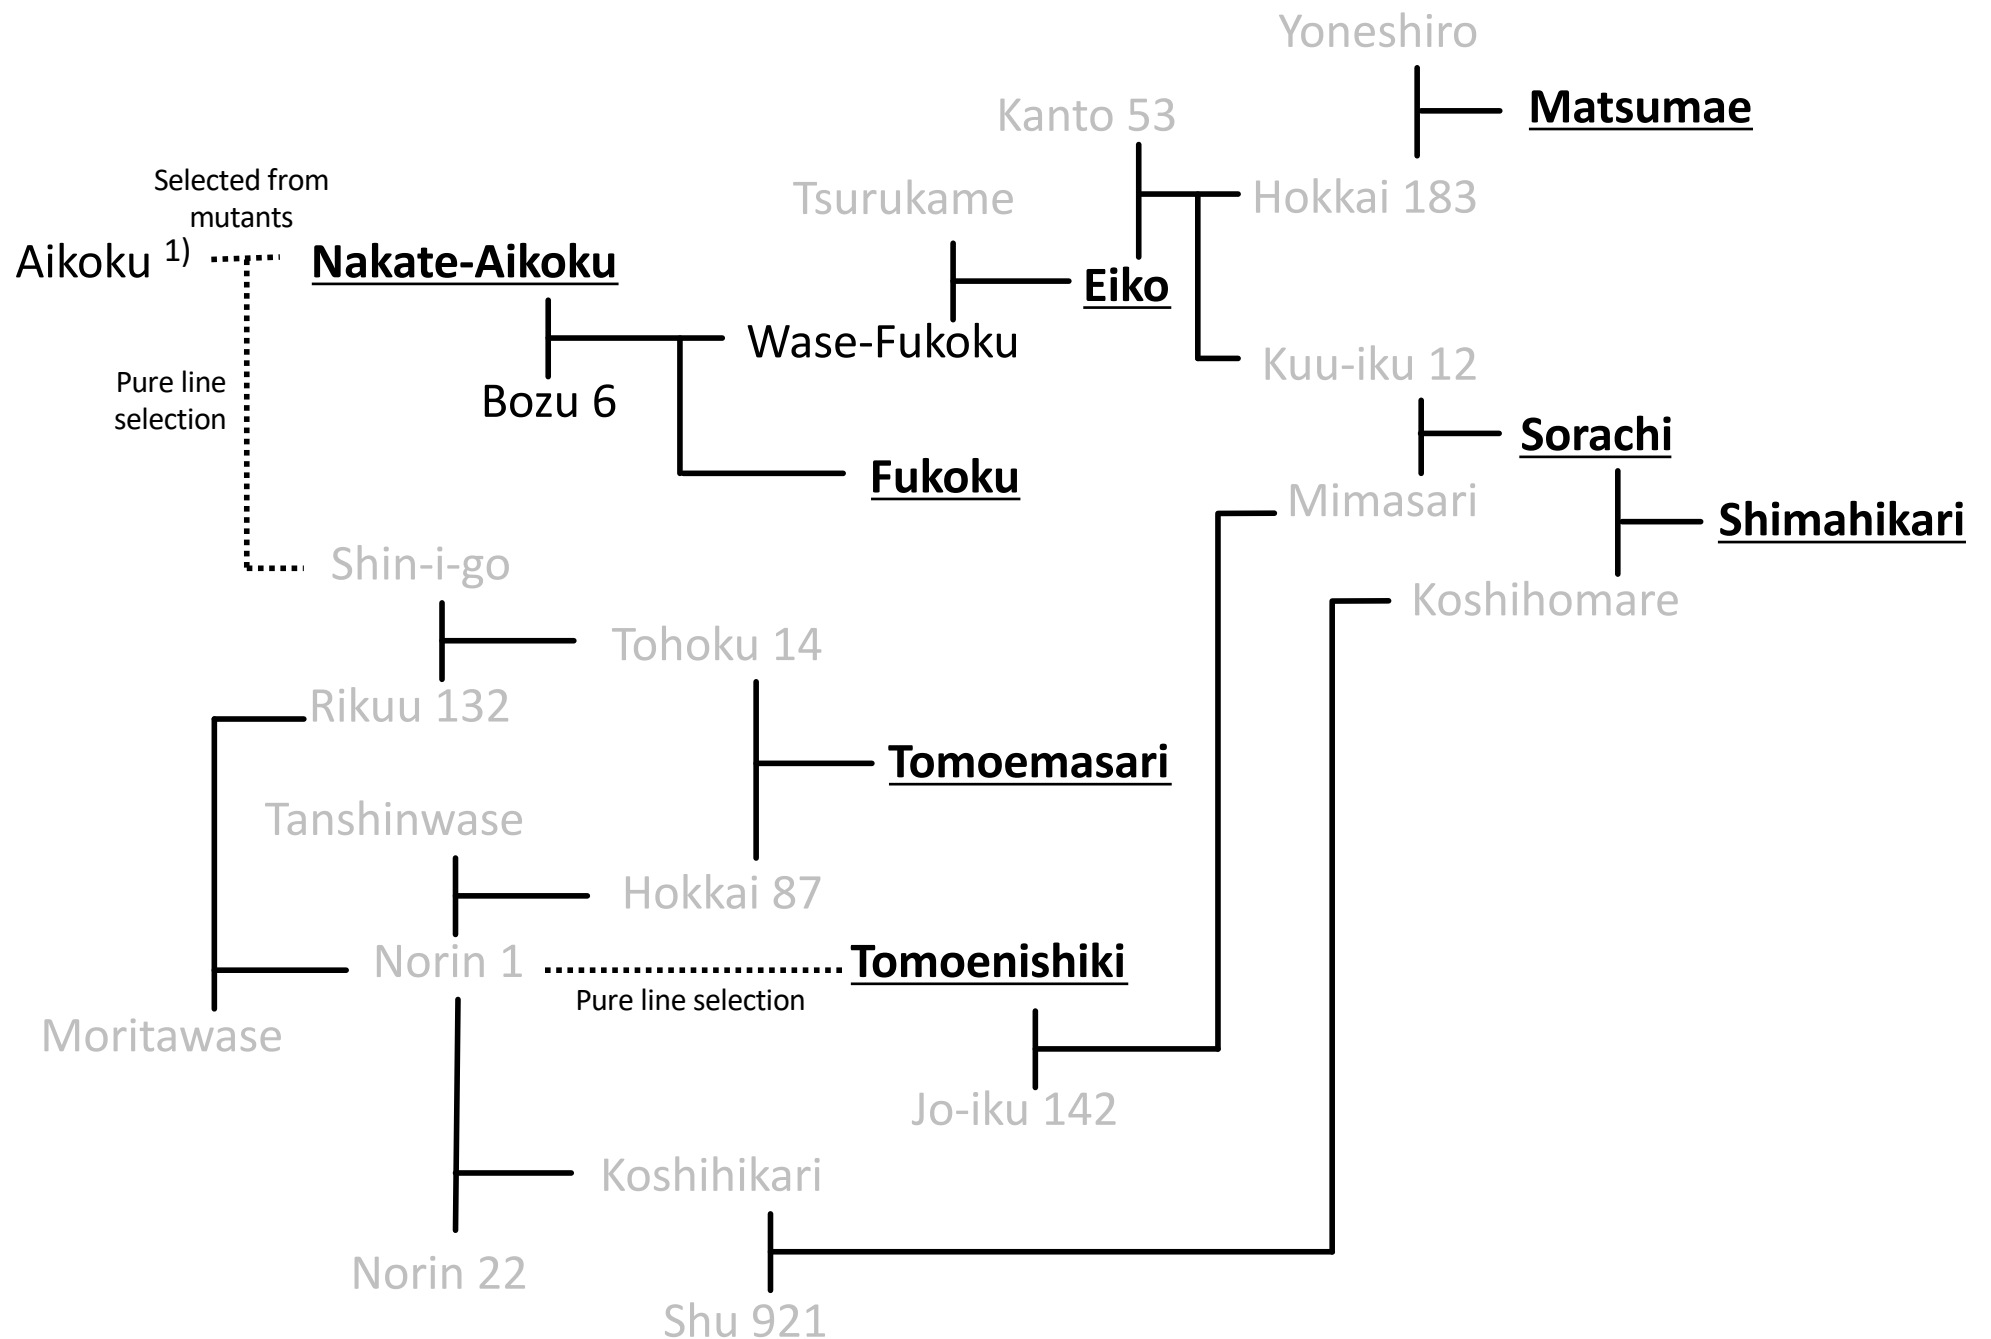

**Figure S1.** Pedigree of the varieties, which harbor *e1-ret/ghd7-0ret* allele. Bold with underline indicates that the varieties harbor *e1-ret/ghd7-0ret* allele. Gray indicates varieties whose allele is unknown. Other indicates that the varieties harbor *e1/ghd7-0a* allele.

<sup>1)</sup> "Aikoku" includes multiple varieties with the mixture of the insertions.

Table S1. Frequency distributions of days to heading in F<sub>3</sub> lines (T65 × T65w)

| Parents and F <sub>3</sub> lines | Genotype of parents and F <sub>2</sub> plants <sup>a</sup> | Days to heading |    |    |    |    |     |     |     |     |     |     |     |     |     |     |     |     |     |     |     |     |     |     |     | Total | No. of F <sub>3</sub> lines observed <sup>b</sup> |     |     |     |     |     |     |     |    |
|----------------------------------|------------------------------------------------------------|-----------------|----|----|----|----|-----|-----|-----|-----|-----|-----|-----|-----|-----|-----|-----|-----|-----|-----|-----|-----|-----|-----|-----|-------|---------------------------------------------------|-----|-----|-----|-----|-----|-----|-----|----|
|                                  |                                                            | 95              | 96 | 97 | 98 | 99 | 100 | 101 | 102 | 103 | 104 | 105 | 106 | 107 | 108 | 109 | 110 | 111 | 112 | 113 | 114 | 115 | 116 | 117 | 118 |       |                                                   | 119 | 120 | 121 | 122 | 123 | 124 | 125 |    |
| T65                              | <i>E1E1</i>                                                | 7               | 5  | 7  | 1  | 1  |     |     |     |     |     |     |     |     |     |     |     |     |     |     |     |     |     |     |     |       |                                                   |     |     |     |     |     |     |     | 21 |
| T65w                             | <i>E1-rE1-r</i>                                            |                 |    |    |    |    |     |     |     |     |     |     |     |     |     |     |     |     |     | 2   | 3   | 2   | 2   | 3   | 4   | 5     | 1                                                 | 2   |     |     |     |     |     | 24  |    |
| 1                                |                                                            |                 |    |    |    | 2  | 1   | 2   | 2   | 7   | 2   | 1   |     |     |     |     |     |     |     |     |     |     |     |     |     |       |                                                   |     |     |     |     |     |     |     | 18 |
| 5                                |                                                            |                 |    |    |    |    | 1   |     | 3   | 3   | 8   | 7   | 1   | 1   | 1   |     |     |     |     |     |     |     |     |     |     |       |                                                   |     |     |     |     |     |     |     | 25 |
| 6                                |                                                            |                 |    |    | 2  |    | 1   | 1   | 2   | 3   | 2   | 3   | 3   |     |     |     |     |     |     |     |     |     |     |     |     |       |                                                   |     |     |     |     |     |     |     | 17 |
| 7                                |                                                            |                 |    | 1  |    | 1  | 5   | 2   | 3   | 6   |     | 1   | 2   | 1   | 2   |     |     |     |     |     |     |     |     |     |     |       |                                                   |     |     |     |     |     |     |     | 24 |
| 12                               |                                                            |                 |    |    |    |    | 3   | 1   | 3   | 7   |     | 3   | 3   | 2   |     |     |     |     |     |     |     |     |     |     |     |       |                                                   |     |     |     |     |     |     |     | 23 |
| 14                               |                                                            |                 |    |    |    |    |     |     |     | 1   | 1   | 4   | 1   |     | 1   |     |     |     |     |     |     |     |     |     |     |       |                                                   |     |     |     |     |     |     |     | 8  |
| 16                               | <i>E1E1</i>                                                |                 |    |    |    |    |     |     | 1   | 3   | 5   | 5   | 4   | 2   | 1   | 1   |     |     |     |     |     |     |     |     |     |       |                                                   |     |     |     |     |     |     |     | 22 |
| 17                               |                                                            |                 |    |    | 1  | 3  | 1   | 6   | 4   | 3   | 2   | 1   | 1   |     |     |     |     |     |     |     |     |     |     |     |     |       |                                                   |     |     |     |     |     |     |     | 22 |
| 18                               |                                                            |                 |    |    |    |    |     | 2   |     | 2   | 3   | 3   | 2   | 2   |     |     |     |     |     |     |     |     |     |     |     |       |                                                   |     |     |     |     |     |     |     | 13 |
| 22                               |                                                            |                 |    |    |    |    |     |     | 3   | 3   | 4   | 5   | 5   | 1   |     |     |     |     |     |     |     |     |     |     |     |       |                                                   |     |     |     |     |     |     |     | 22 |
| 23                               |                                                            |                 |    |    |    | 1  |     | 2   | 2   | 3   | 2   |     |     |     |     |     |     |     |     |     |     |     |     |     |     |       |                                                   |     |     |     |     |     |     |     | 11 |
| 25                               |                                                            |                 |    |    |    |    | 1   | 1   | 1   | 4   | 5   | 3   | 2   | 4   | 2   |     |     |     |     |     |     |     |     |     |     |       |                                                   |     |     |     |     |     |     |     | 22 |
| 26                               |                                                            |                 |    |    |    |    | 1   | 1   | 3   | 7   | 3   | 3   | 1   |     |     |     |     |     |     |     |     |     |     |     |     |       |                                                   |     |     |     |     |     |     |     | 20 |
| 2                                |                                                            |                 |    |    |    |    |     | 1   |     | 1   |     | 1   | 1   | 1   | 1   | 2   | 1   | 4   | 1   | 2   |     | 3   |     | 1   | 1   |       |                                                   |     |     |     |     |     |     | 21  |    |
| 4                                |                                                            |                 |    |    |    |    |     |     |     |     |     | 3   |     |     |     | 2   | 1   | 6   | 2   |     | 1   | 3   | 2   |     |     |       |                                                   |     |     |     |     |     |     | 20  |    |
| 8                                |                                                            |                 |    |    |    |    |     |     |     | 1   |     | 3   | 2   | 1   | 3   | 2   | 1   | 2   | 2   |     | 2   | 2   |     | 1   |     |       |                                                   |     |     |     |     |     |     | 22  |    |
| 9                                |                                                            |                 |    |    |    |    |     |     |     |     |     |     | 2   |     | 5   |     |     |     |     |     |     |     | 2   | 1   |     | 1     | 2                                                 | 1   |     |     |     |     |     | 17  |    |
| 10                               |                                                            |                 |    |    |    |    |     | 1   | 1   |     | 2   | 3   |     |     |     | 2   | 2   | 5   | 1   | 3   | 1   |     | 1   | 1   | 1   |       |                                                   |     |     |     |     |     |     | 24  |    |
| 11                               |                                                            |                 |    |    |    |    |     |     |     | 1   |     | 1   | 2   | 3   | 1   | 1   | 2   | 2   | 5   | 2   | 1   | 2   | 1   | 1   | 1   |       |                                                   |     |     |     |     |     |     | 25  |    |
| 13                               | <i>E1E1-r</i>                                              |                 |    |    |    |    |     |     | 2   |     | 1   |     | 1   | 3   | 1   | 2   | 2   | 1   | 1   | 3   |     | 1   | 4   | 1   |     |       |                                                   |     |     |     |     |     |     | 23  |    |
| 19                               |                                                            |                 |    |    |    |    |     |     |     | 1   | 1   | 1   | 1   |     |     | 4   | 2   | 2   |     |     |     | 1   | 1   |     |     |       |                                                   |     |     |     |     |     |     | 14  |    |
| 24                               |                                                            |                 |    |    |    |    |     |     |     | 2   | 2   | 1   | 2   | 1   |     | 1   | 3   | 2   | 5   | 1   | 1   |     |     |     |     | 2     |                                                   |     |     |     |     |     |     | 23  |    |
| 29                               |                                                            |                 |    |    |    |    |     | 3   |     | 1   |     | 1   |     |     |     | 2   | 5   | 2   | 1   | 2   | 1   |     | 1   |     |     |       |                                                   |     |     |     |     |     |     | 19  |    |
| 30                               |                                                            |                 |    |    |    |    |     |     |     |     |     |     | 2   |     |     | 1   | 4   | 2   | 4   | 2   | 4   |     |     | 1   | 1   |       |                                                   |     |     |     |     |     |     | 21  |    |
| 33                               |                                                            |                 |    |    |    |    |     |     |     |     | 1   | 2   |     | 1   | 1   | 2   | 1   | 3   | 2   |     |     |     |     | 5   | 2   | 1     | 1                                                 | 1   |     |     |     |     |     | 23  |    |
| 37                               |                                                            |                 |    |    | 1  |    | 1   | 1   | 3   | 1   | 1   |     |     |     | 3   | 1   | 2   | 1   | 2   |     |     |     | 1   | 2   | 2   |       |                                                   |     |     |     |     |     |     | 22  |    |
| 39                               |                                                            |                 |    |    |    |    |     |     |     | 1   | 1   |     | 2   | 3   | 1   | 1   | 2   | 3   |     | 1   | 4   | 1   | 2   | 2   |     |       |                                                   |     |     |     |     |     |     | 24  |    |
| 3                                |                                                            |                 |    |    |    |    |     |     |     |     |     |     |     |     |     |     |     |     |     |     |     | 4   | 7   | 8   | 2   | 2     | 1                                                 |     |     |     |     |     |     | 24  |    |
| 20                               |                                                            |                 |    |    |    |    |     |     |     |     |     |     |     |     |     |     |     |     |     | 1   | 1   |     | 2   | 3   | 5   | 4     | 3                                                 | 1   |     |     |     |     |     | 20  |    |
| 21                               |                                                            |                 |    |    |    |    |     |     |     |     |     |     |     |     |     |     |     |     |     | 2   |     | 2   | 3   | 5   | 4   | 1     | 3                                                 |     | 1   |     |     |     |     | 20  |    |
| 27                               |                                                            |                 |    |    |    |    |     |     |     |     |     |     |     |     | 1   | 3   | 1   | 3   | 1   | 5   | 2   | 2   | 2   | 1   |     | 1     |                                                   |     |     |     |     |     |     | 20  |    |
| 28                               |                                                            |                 |    |    |    |    |     |     |     |     |     |     |     |     |     |     |     |     | 3   |     | 4   | 3   | 7   | 6   | 1   |       |                                                   |     |     |     |     |     |     | 24  |    |
| 31                               | <i>E1-rE1-r</i>                                            |                 |    |    |    |    |     |     |     |     |     |     |     |     |     |     |     |     | 1   | 2   |     | 1   | 4   | 7   | 5   | 2     | 1                                                 |     |     |     |     |     |     | 23  |    |
| 32                               |                                                            |                 |    |    |    |    |     |     |     |     |     |     |     |     |     |     |     |     | 1   | 1   |     | 3   | 2   | 6   | 7   | 3     |                                                   |     |     |     |     |     |     | 23  |    |
| 34                               |                                                            |                 |    |    |    |    |     |     |     |     |     |     |     |     |     |     |     |     |     |     |     | 1   |     | 4   | 4   | 4     | 3                                                 | 5   | 1   | 2   |     |     |     | 24  |    |
| 35                               |                                                            |                 |    |    |    |    |     |     |     |     |     |     |     |     |     | 1   |     |     | 2   |     | 5   | 3   | 2   | 4   | 1   |       |                                                   |     |     |     |     |     |     | 18  |    |
| 36                               |                                                            |                 |    |    |    |    |     |     |     |     |     |     |     |     |     |     |     |     | 1   | 1   | 1   | 1   | 5   | 8   | 2   | 3     |                                                   |     |     |     |     |     |     | 22  |    |
| 40                               |                                                            |                 |    |    |    |    |     |     |     |     |     |     |     |     |     |     |     |     |     |     |     |     | 1   | 1   | 1   | 3     | 6                                                 | 6   | 5   | 1   |     |     |     |     | 24 |

<sup>a</sup> *E1* and *E1-r* are early and late heading alleles of *E1* locus, respectively.

<sup>b</sup> *E1E1* : *E1E1-r* : *E1-rE1-r* = 13:14:11,  $\chi^2 = 8.904$ ,  $P = 0.012$

Table S2. Frequency distributions of days to heading in F<sub>3</sub> lines (T65m × T65w)

| Parents and F <sub>3</sub> lines | Genotype of parents and F <sub>2</sub> plants <sup>a</sup> | Days to heading |    |    |    |    |     |     |     |     |     |     |     |     |     |     |     |     |     |     |     |     |     |     |     |     | Total | No. of F <sub>3</sub> lines observed <sup>b</sup> |     |     |     |     |     |     |
|----------------------------------|------------------------------------------------------------|-----------------|----|----|----|----|-----|-----|-----|-----|-----|-----|-----|-----|-----|-----|-----|-----|-----|-----|-----|-----|-----|-----|-----|-----|-------|---------------------------------------------------|-----|-----|-----|-----|-----|-----|
|                                  |                                                            | 95              | 96 | 97 | 98 | 99 | 100 | 101 | 102 | 103 | 104 | 105 | 106 | 107 | 108 | 109 | 110 | 111 | 112 | 113 | 114 | 115 | 116 | 117 | 118 | 119 |       |                                                   | 120 | 121 | 122 | 123 | 124 | 125 |
| T65m                             | <i>e1e1</i>                                                |                 |    |    | 1  |    | 8   | 5   | 5   |     |     |     |     |     |     |     |     |     |     |     |     |     |     |     |     |     |       |                                                   |     |     |     |     |     | 19  |
| T65w                             | <i>E1-rE1-r</i>                                            |                 |    |    |    |    |     |     |     |     |     |     |     |     |     |     |     |     |     | 2   | 3   | 2   | 2   | 3   | 4   | 5   | 1     | 2                                                 |     |     |     | 24  |     |     |
| 8                                |                                                            |                 | 1  |    | 2  | 2  | 1   | 6   | 7   | 4   |     |     |     |     |     |     |     |     |     |     |     |     |     |     |     |     |       |                                                   |     |     |     |     | 23  |     |
| 18                               |                                                            |                 | 1  |    |    | 4  | 6   | 2   | 7   | 2   |     |     |     |     | 2   |     |     |     |     |     |     |     |     |     |     |     |       |                                                   |     |     |     |     | 24  |     |
| 20                               |                                                            |                 |    |    | 1  | 1  | 3   | 6   | 4   | 1   | 2   | 1   | 1   | 1   |     |     |     |     |     |     |     |     |     |     |     |     |       |                                                   |     |     |     |     | 20  |     |
| 21                               |                                                            |                 | 3  | 2  | 3  | 4  | 2   | 2   | 4   | 1   |     |     |     |     |     |     |     |     |     |     |     |     |     |     |     |     |       |                                                   |     |     |     |     | 21  |     |
| 28                               | <i>e1e1</i>                                                |                 |    |    | 2  | 4  | 4   | 5   | 4   | 1   |     |     |     |     |     |     |     |     |     |     |     |     |     |     |     |     |       |                                                   |     |     |     |     | 20  |     |
| 29                               |                                                            |                 |    |    | 3  | 5  |     | 7   | 6   | 1   |     |     |     | 1   |     |     |     |     |     |     |     |     |     |     |     |     |       |                                                   |     |     |     |     | 23  |     |
| 34                               |                                                            |                 |    |    | 4  | 2  | 1   | 4   | 8   | 2   |     |     |     | 1   |     |     |     |     |     |     |     |     |     |     |     |     |       |                                                   |     |     |     |     | 22  |     |
| 35                               |                                                            | 1               | 1  |    | 5  | 1  | 1   |     |     |     |     |     |     |     |     |     |     |     |     |     |     |     |     |     |     |     |       |                                                   |     |     |     |     | 9   |     |
| 40                               |                                                            |                 |    |    |    |    |     |     |     | 2   |     |     |     |     |     |     |     |     |     |     |     |     |     |     |     |     |       |                                                   |     |     |     |     | 3   |     |
| 52                               |                                                            |                 | 1  |    | 1  |    | 4   | 5   | 6   | 1   | 2   |     |     |     | 1   |     |     |     |     |     |     |     |     |     |     |     |       |                                                   |     |     |     |     | 20  |     |
| 3                                |                                                            |                 |    |    |    |    |     | 1   |     |     |     |     | 1   |     | 3   | 2   | 2   | 3   | 3   |     |     | 3   | 1   | 1   | 2   |     |       |                                                   | 1   |     |     | 23  |     |     |
| 4                                |                                                            |                 |    |    |    |    |     |     | 2   | 4   | 1   | 1   | 1   |     |     | 1   |     | 3   | 4   | 1   | 1   | 1   | 2   |     | 1   |     |       | 3                                                 |     |     |     | 25  |     |     |
| 7                                |                                                            |                 |    |    |    |    |     | 2   |     |     |     | 1   |     | 1   |     | 1   |     | 3   | 1   | 4   | 2   | 2   | 2   |     |     | 2   |       |                                                   |     |     |     | 21  |     |     |
| 9                                |                                                            |                 |    | 1  |    | 1  |     |     | 1   | 4   | 1   |     |     |     | 2   |     | 3   | 3   | 1   | 3   | 3   | 1   | 1   |     |     |     |       |                                                   |     |     |     |     | 25  |     |
| 10                               |                                                            |                 |    |    |    |    | 1   | 2   | 2   |     |     |     |     |     | 2   | 2   | 3   | 2   | 1   |     | 5   | 1   | 1   |     |     |     |       |                                                   |     |     |     |     | 22  |     |
| 11                               |                                                            |                 |    |    |    |    |     | 1   |     |     | 1   |     |     |     | 1   | 1   | 4   | 1   | 1   | 2   | 1   | 1   |     |     | 1   |     |       |                                                   |     |     |     |     | 15  |     |
| 12                               |                                                            |                 |    |    |    | 1  |     | 2   | 1   | 4   |     |     |     |     | 1   | 1   | 1   | 2   | 4   |     |     |     |     | 2   |     |     | 1     |                                                   |     |     |     |     | 20  |     |
| 15                               |                                                            |                 |    |    | 1  |    |     | 3   | 1   |     |     |     |     | 1   |     | 2   | 1   | 1   | 1   | 1   | 1   |     |     |     |     |     |       | 1                                                 |     |     |     |     | 12  |     |
| 16                               |                                                            |                 |    |    |    |    |     |     | 2   |     | 2   |     |     | 1   |     | 2   | 1   | 2   | 2   | 2   |     | 1   | 1   | 1   | 1   | 4   |       |                                                   |     |     |     |     | 22  |     |
| 19                               |                                                            |                 |    |    |    |    | 1   | 1   |     |     |     |     |     | 1   |     | 2   | 2   |     | 1   |     | 1   | 1   | 1   | 1   |     |     |       |                                                   |     |     |     |     | 11  |     |
| 23                               | <i>e1E1-r</i>                                              |                 |    |    |    |    |     | 2   | 1   | 1   |     | 1   |     |     | 2   | 1   | 2   | 2   | 3   | 2   |     | 3   | 1   | 1   |     |     |       |                                                   |     |     |     |     | 22  |     |
| 24                               |                                                            |                 |    |    | 1  | 1  | 1   | 1   | 1   | 1   |     |     |     |     | 2   | 1   | 2   | 3   | 5   | 1   |     | 1   | 1   | 2   |     | 1   |       |                                                   |     |     |     |     | 22  |     |
| 27                               |                                                            |                 |    | 2  |    | 2  |     |     |     |     |     |     |     |     | 3   | 1   | 4   | 3   | 1   |     |     | 1   | 1   | 1   |     | 1   |       |                                                   |     |     |     |     | 20  |     |
| 33                               |                                                            |                 |    |    |    |    |     | 1   |     |     |     |     |     |     | 1   | 1   |     | 1   | 2   |     |     |     | 2   |     | 1   |     |       |                                                   |     |     |     |     | 9   |     |
| 36                               |                                                            |                 |    | 1  | 1  |    |     | 1   | 2   | 2   |     |     |     |     | 1   | 1   | 3   | 1   | 3   | 1   | 2   | 2   | 1   | 2   | 2   |     |       |                                                   |     |     |     |     | 24  |     |
| 37                               |                                                            |                 |    |    |    | 1  | 3   |     |     |     |     |     | 1   |     | 2   | 3   | 1   | 3   | 1   | 2   | 2   | 1   | 1   | 1   | 1   |     | 1     |                                                   |     |     |     |     | 23  |     |
| 38                               |                                                            |                 |    |    |    |    | 2   | 1   | 2   | 2   |     |     |     |     | 1   | 4   | 6   | 1   | 1   | 1   | 1   | 1   | 1   | 1   |     | 1   |       |                                                   |     |     |     |     | 23  |     |
| 42                               |                                                            |                 |    | 1  |    |    |     |     |     | 2   | 1   |     |     | 1   | 1   |     |     |     | 2   | 5   | 2   | 2   |     | 3   |     | 2   | 1     |                                                   |     |     |     |     | 25  |     |
| 51                               |                                                            |                 |    | 1  |    |    | 1   | 1   | 3   |     |     |     |     |     | 1   | 3   | 2   | 4   |     | 1   | 2   | 1   | 1   | 1   | 1   | 1   |       |                                                   |     |     |     |     | 23  |     |
| 54                               |                                                            |                 |    | 1  | 1  |    |     | 4   | 1   |     |     |     |     | 1   | 1   | 2   | 2   | 1   | 1   |     |     |     |     | 1   |     |     |       |                                                   |     |     |     |     |     | 17  |
| 55                               |                                                            |                 |    |    | 1  | 1  | 1   | 1   | 2   |     |     |     | 1   |     | 2   | 6   | 1   | 3   | 2   |     |     |     | 1   |     |     |     |       |                                                   |     |     |     |     |     | 21  |
| 2                                |                                                            |                 |    |    |    |    |     |     |     |     |     |     |     |     |     |     |     | 1   | 1   | 3   | 3   | 5   | 6   | 1   | 2   | 3   |       |                                                   |     |     |     |     | 25  |     |
| 6                                |                                                            |                 |    |    |    |    |     |     |     |     |     |     |     |     |     |     |     |     | 7   | 7   | 3   | 4   | 1   |     | 1   |     |       |                                                   |     |     |     |     |     | 23  |
| 31                               |                                                            |                 |    |    |    |    |     |     |     |     |     |     |     |     | 1   |     |     |     |     |     | 1   |     | 7   | 7   | 2   | 1   |       |                                                   | 2   |     |     |     | 21  |     |
| 32                               |                                                            |                 |    |    |    |    |     |     |     |     |     |     |     |     |     |     |     |     | 4   | 2   | 1   | 5   | 3   | 3   | 4   |     |       |                                                   |     |     |     |     |     | 22  |
| 39                               | <i>E1-rE1-r</i>                                            |                 |    |    |    |    |     |     |     |     |     |     |     |     |     |     |     | 5   | 5   | 2   | 4   | 3   | 2   | 2   |     |     |       |                                                   |     |     |     |     |     | 23  |
| 41                               |                                                            |                 |    |    |    |    |     |     |     |     |     |     |     |     | 1   |     | 2   | 2   | 2   | 3   | 5   | 2   | 2   | 2   |     |     |       |                                                   |     |     |     |     |     | 21  |
| 53                               |                                                            |                 |    |    |    |    |     |     |     |     |     |     |     |     |     | 1   | 4   | 2   | 5   | 6   | 5   |     |     |     |     |     |       |                                                   |     |     |     |     |     | 23  |
| 56                               |                                                            |                 |    |    |    |    |     |     |     |     |     |     |     |     |     |     | 1   | 1   | 3   | 5   | 7   | 3   | 4   |     |     |     |       |                                                   |     |     |     |     |     | 24  |
| 57                               |                                                            |                 |    |    |    |    |     |     |     |     |     |     |     |     |     |     |     |     |     |     | 2   | 5   | 6   | 6   |     |     |       |                                                   |     |     |     |     |     | 19  |

<sup>a</sup> *e1* and *E1-r* are early and late heading alleles of *E1* locus, respectively.

<sup>b</sup> *e1e1* : *e1E1-r* : *E1-rE1-r* = 9:21:10,  $\chi^2 = 0.150$ ,  $P = 0.928$

**Table S3. Lists of varieties used in this study**

| Group              | Name            | Origin   | ID No. <sup>1)</sup> | landrace/improved | Subspecies | Haplotype around <i>E1</i> locus <sup>2)</sup> | Allele of <i>E1/Ghd7</i> locus <sup>2)</sup> | Days to heading <sup>2), 3)</sup> |
|--------------------|-----------------|----------|----------------------|-------------------|------------|------------------------------------------------|----------------------------------------------|-----------------------------------|
| Hokkaido varieties | Akabozu         | Hokkaido | -                    | improved          | Japonica   | Hap1                                           | <i>e1/ghd7-0a</i>                            | 69.9                              |
|                    | Akage           | Hokkaido | -                    | landrace          | Japonica   | Hap1                                           | <i>e1/ghd7-0a</i>                            | 68.4                              |
|                    | Akatsuki        | Hokkaido | -                    | improved          | Japonica   | Hap1                                           | <i>e1/ghd7-0a</i>                            | 65.3                              |
|                    | Bozu            | Hokkaido | -                    | landrace          | Japonica   | Hap1                                           | <i>e1/ghd7-0a</i>                            | 68.4                              |
|                    | Bozu 6          | Hokkaido | -                    | improved          | Japonica   | Hap1                                           | <i>e1/ghd7-0a</i>                            | 67.2                              |
|                    | Dohoku 5        | Hokkaido | -                    | improved          | Japonica   | Hap1                                           | <i>e1/ghd7-0a</i>                            | 65.1                              |
|                    | Eiko            | Hokkaido | -                    | improved          | Japonica   | Hap3                                           | <i>e1-ret/ghd7-0ret</i>                      | 65.6                              |
|                    | Fukoku          | Hokkaido | -                    | improved          | Japonica   | Hap3                                           | <i>e1-ret/ghd7-0ret</i>                      | 66.0                              |
|                    | Fukuyuki        | Hokkaido | -                    | improved          | Japonica   | Hap1                                           | <i>e1/ghd7-0a</i>                            | 68.1                              |
|                    | Hashiribozu     | Hokkaido | -                    | improved          | Japonica   | Hap1                                           | <i>e1/ghd7-0a</i>                            | 65.1                              |
|                    | Hayakaze        | Hokkaido | -                    | improved          | Japonica   | Hap1                                           | <i>e1/ghd7-0a</i>                            | 64.5                              |
|                    | Hayakogane      | Hokkaido | -                    | improved          | Japonica   | Hap1                                           | <i>e1/ghd7-0a</i>                            | 67.1                              |
|                    | Hayamasari      | Hokkaido | -                    | improved          | Japonica   | Hap1                                           | <i>e1/ghd7-0a</i>                            | 65.4                              |
|                    | Hokkai 126      | Hokkaido | -                    | improved          | Japonica   | Hap1                                           | <i>e1/ghd7-0a</i>                            | 63.8                              |
|                    | Hokkai 242      | Hokkaido | -                    | improved          | Japonica   | Hap1                                           | <i>e1/ghd7-0a</i>                            | 63.5                              |
|                    | Hokkai 244      | Hokkaido | -                    | improved          | Japonica   | Hap1                                           | <i>e1/ghd7-0a</i>                            | 65.3                              |
|                    | Hokuto          | Hokkaido | -                    | improved          | Japonica   | Hap1                                           | <i>e1/ghd7-0a</i>                            | 64.2                              |
|                    | Iburiwase       | Hokkaido | -                    | landrace          | Japonica   | Hap1                                           | <i>e1/ghd7-0a</i>                            | 65.3                              |
|                    | Ishikari        | Hokkaido | -                    | improved          | Japonica   | Hap1                                           | <i>e1/ghd7-0a</i>                            | 66.0                              |
|                    | Ishikarisirage  | Hokkaido | -                    | improved          | Japonica   | Hap1                                           | <i>e1/ghd7-0a</i>                            | 67.8                              |
|                    | Jo-iku 100      | Hokkaido | -                    | improved          | Japonica   | Hap1                                           | <i>e1/ghd7-0a</i>                            | 67.8                              |
|                    | Jo-iku 272      | Hokkaido | -                    | improved          | Japonica   | Hap1                                           | <i>e1/ghd7-0a</i>                            | 64.4                              |
|                    | Kirara 397      | Hokkaido | -                    | improved          | Japonica   | Hap1                                           | <i>e1/ghd7-0a</i>                            | 71.3                              |
|                    | Kitaake         | Hokkaido | -                    | improved          | Japonica   | Hap1                                           | <i>e1/ghd7-0a</i>                            | 66.4                              |
|                    | Kitahikari      | Hokkaido | -                    | improved          | Japonica   | Hap1                                           | <i>e1/ghd7-0a</i>                            | 68.3                              |
|                    | Kitakogane      | Hokkaido | -                    | improved          | Japonica   | Hap1                                           | <i>e1/ghd7-0a</i>                            | 66.6                              |
|                    | Kiyokaze        | Hokkaido | -                    | improved          | Japonica   | Hap1                                           | <i>e1/ghd7-0a</i>                            | 65.1                              |
|                    | Kyowa           | Hokkaido | -                    | improved          | Japonica   | Hap1                                           | <i>e1/ghd7-0a</i>                            | 67.7                              |
|                    | Matsumae        | Hokkaido | -                    | improved          | Japonica   | Hap3                                           | <i>e1-ret/ghd7-0ret</i>                      | 68.3                              |
|                    | Megurosakaemoti | Hokkaido | -                    | improved          | Japonica   | Hap1                                           | <i>e1/ghd7-0a</i>                            | 71.5                              |
|                    | Norin 11        | Hokkaido | -                    | improved          | Japonica   | Hap1                                           | <i>e1/ghd7-0a</i>                            | 63.0                              |
|                    | Norin 15        | Hokkaido | -                    | improved          | Japonica   | Hap1                                           | <i>e1/ghd7-0a</i>                            | 63.8                              |
|                    | Norin 33        | Hokkaido | -                    | improved          | Japonica   | Hap1                                           | <i>e1/ghd7-0a</i>                            | 64.6                              |
|                    | Sakigake        | Hokkaido | -                    | landrace          | Japonica   | Hap1                                           | <i>e1/ghd7-0a</i>                            | 65.7                              |
|                    | Sasahonami      | Hokkaido | -                    | improved          | Japonica   | Hap1                                           | <i>e1/ghd7-0a</i>                            | 66.6                              |
|                    | Shimahikari     | Hokkaido | -                    | improved          | Japonica   | Hap3                                           | <i>e1-ret/ghd7-0ret</i>                      | 69.3                              |
| Shinei             | Hokkaido        | -        | improved             | Japonica          | Hap1       | <i>e1/ghd7-0a</i>                              | 73.4                                         |                                   |
| Shiokari           | Hokkaido        | -        | improved             | Japonica          | Hap1       | <i>e1/ghd7-0a</i>                              | 65.7                                         |                                   |
| Sorachi            | Hokkaido        | -        | improved             | Japonica          | Hap3       | <i>e1-ret/ghd7-0ret</i>                        | 73.2                                         |                                   |
| Tokachikuroge      | Hokkaido        | -        | improved             | Japonica          | Hap1       | <i>e1/ghd7-0a</i>                              | 60.8                                         |                                   |
| Tomomasari         | Hokkaido        | -        | improved             | Japonica          | Hap3       | <i>e1-ret/ghd7-0ret</i>                        | 73.1                                         |                                   |
| Tomonishiki        | Hokkaido        | -        | improved             | Japonica          | Hap3       | <i>e1-ret/ghd7-0ret</i>                        | 72.4                                         |                                   |
| Wasebozu           | Hokkaido        | -        | landrace             | Japonica          | Hap1       | <i>e1/ghd7-0a</i>                              | 62.8                                         |                                   |
| Wasehukoku         | Hokkaido        | -        | improved             | Japonica          | Hap1       | <i>e1/ghd7-0a</i>                              | 66.4                                         |                                   |

**Table S3. Lists of varieties used in this study**

| Group                    | Name                | Origin          | ID No. <sup>1)</sup> | landrace/improved | Subspecies        | Haplotype around <i>E1</i> locus <sup>2)</sup> | Allele of <i>E1/Ghd7</i> locus <sup>2)</sup> | Days to heading <sup>2), 3)</sup> |
|--------------------------|---------------------|-----------------|----------------------|-------------------|-------------------|------------------------------------------------|----------------------------------------------|-----------------------------------|
| Japanese core collection | Gaisen Mochi        | Japan (Unknown) | JRC 01               | landrace          | Tropical Japonica | N. A.                                          | <i>E1/Ghd7-2</i>                             | 103.5                             |
|                          | Hinode              | Kinki           | JRC 03               | improved          | Tropical Japonica | Hap4                                           | <i>E1/Ghd7-2</i>                             | 86.3                              |
|                          | Senshou             | Tokyo           | JRC 04               | landrace          | Tropical Japonica | Hap4                                           | <i>E1/Ghd7-2</i>                             | 87.0                              |
|                          | Yamada Bake         | Kagoshima       | JRC 05               | landrace          | Tropical Japonica | Hap4                                           | <i>E1/Ghd7-2</i>                             | 94.5                              |
|                          | Kaneko              | Kantotozan      | JRC 06               | landrace          | Tropical Japonica | Hap4                                           | <i>E1/Ghd7-2</i>                             | 84.1                              |
|                          | Iruma Nishiki       | Saitama         | JRC 07               | landrace          | Tropical Japonica | Hap4                                           | <i>E1/Ghd7-2</i>                             | 84.9                              |
|                          | Okka Modoshi        | Japan (Unknown) | JRC 08               | landrace          | Tropical Japonica | Hap4                                           | <i>E1/Ghd7-2</i>                             | 101.0                             |
|                          | Hirayama            | Tokyo           | JRC 10               | landrace          | Tropical Japonica | Hap4                                           | <i>E1/Ghd7-2</i>                             | 84.3                              |
|                          | Kahei               | Kagoshima       | JRC 11               | landrace          | Tropical Japonica | Hap4                                           | <i>E1/Ghd7-2</i>                             | N. A.                             |
|                          | Oiran               | Kumamoto        | JRC 12               | landrace          | Tropical Japonica | Hap4                                           | <i>E1/Ghd7-2</i>                             | 91.8                              |
|                          | Bouzu Mochi         | Oita            | JRC 13               | landrace          | Tropical Japonica | Hap4                                           | <i>E1/Ghd7-2</i>                             | 92.8                              |
|                          | Meguro Mochi        | Kantotozan      | JRC 14               | landrace          | Tropical Japonica | Hap4                                           | <i>E1/Ghd7-2</i>                             | 103.0                             |
|                          | Akage               | Hokkaido        | JRC 17               | landrace          | Japonica          | Hap1                                           | <i>e1/ghd7-0a</i>                            | N. A.                             |
|                          | Hassokuho           | Japan (Unknown) | JRC 18               | landrace          | Japonica          | Hap4                                           | <i>E1/Ghd7-2</i>                             | 93.0                              |
|                          | Wataribune          | Shiga           | JRC 19               | landrace          | Japonica          | Hap4                                           | <i>E1/Ghd7-2</i>                             | 109.4                             |
|                          | Hosogara            | Aomori          | JRC 20               | landrace          | Japonica          | Hap4                                           | <i>E1/Ghd7-2</i>                             | 78.5                              |
|                          | Akamai              | Kochi           | JRC 21               | landrace          | Japonica          | Hap4                                           | <i>E1/Ghd7-2</i>                             | 96.4                              |
|                          | Mansaku             | Nagano          | JRC 22               | landrace          | Japonica          | Hap4                                           | <i>E1/Ghd7-2</i>                             | 89.3                              |
|                          | Ishijiro            | Toyama          | JRC 23               | landrace          | Japonica          | Hap2                                           | <i>E1/Ghd7-2</i>                             | 98.8                              |
|                          | Joushuu             | Yamagata        | JRC 24               | landrace          | Japonica          | Hap4                                           | <i>E1/Ghd7-2</i>                             | 92.7                              |
|                          | Dango               | Japan (Unknown) | JRC 25               | landrace          | Japonica          | Hap4                                           | <i>E1/Ghd7-2</i>                             | 109.6                             |
|                          | Aikoku              | Fukui           | JRC 26               | landrace          | Japonica          | Hap3                                           | <i>e1-ret/ghd7-0ret</i>                      | 91.3                              |
|                          | Ginbouzu            | Ishikawa        | JRC 27               | landrace          | Japonica          | Hap4                                           | <i>E1/Ghd7-2</i>                             | 102.3                             |
|                          | Shinriki Mochi      | Kumamoto        | JRC 28               | landrace          | Japonica          | Hap4                                           | <i>E1/Ghd7-2</i>                             | 111.3                             |
|                          | Shichimenchou Mochi | Japan (Unknown) | JRC 29               | landrace          | Japonica          | Hap4                                           | <i>E1/Ghd7-2</i>                             | 107.4                             |
|                          | Morita Wase         | Yamagata        | JRC 30               | landrace          | Japonica          | Hap4                                           | <i>E1/Ghd7-2</i>                             | 82.0                              |
|                          | Kameji              | Shimane         | JRC 31               | landrace          | Japonica          | Hap4                                           | <i>E1/Ghd7-2</i>                             | 106.5                             |
|                          | Omachi              | Okayama         | JRC 32               | landrace          | Japonica          | Hap4                                           | <i>E1/Ghd7-2</i>                             | 114.0                             |
|                          | Shinriki            | Hyogo           | JRC 33               | landrace          | Japonica          | Hap4                                           | <i>E1/Ghd7-2</i>                             | 110.0                             |
|                          | Kyoutoasahi         | Kyoto           | JRC 34               | landrace          | Japonica          | Hap4                                           | <i>E1/Ghd7-2</i>                             | 110.4                             |
|                          | Kabashiko           | Miyazaki        | JRC 35               | landrace          | Japonica          | Hap4                                           | <i>E1/Ghd7-2</i>                             | 106.9                             |
|                          | Sekiyama            | Aomori          | JRC 36               | landrace          | Japonica          | Hap4                                           | <i>E1/Ghd7-2</i>                             | 78.8                              |
|                          | Shinyamadaho 2      | Hyogo           | JRC 37               | landrace          | Japonica          | Hap2                                           | <i>E1/Ghd7-2</i>                             | 108.8                             |
|                          | Nagoya Shiro        | Akita           | JRC 38               | landrace          | Japonica          | Hap5                                           | <i>E1/Ghd7-2</i>                             | 91.7                              |
|                          | Shiroine (Kemomi)   | Tokushima       | JRC 39               | landrace          | Japonica          | Hap4                                           | <i>E1/Ghd7-2</i>                             | 109.8                             |
|                          | Akamai              | Nagasaki        | JRC 40               | landrace          | Indica            | Hap2                                           | <i>E1/Ghd7-2</i>                             | 116.4                             |
|                          | Akamai              | Tokushima       | JRC 41               | landrace          | Indica            | Hap2                                           | <i>E1/Ghd7-2</i>                             | 110.9                             |
|                          | Touboshi            | Kagoshima       | JRC 42               | landrace          | Indica            | N. A.                                          | N. A.                                        | N. A.                             |
|                          | Akamai              | Kantotozan      | JRC 43               | landrace          | Indica            | Hap4                                           | <i>E1/Ghd7-2</i>                             | 98.6                              |
|                          | Karahoushi          | Kagoshima       | JRC 44               | landrace          | Indica            | N. A.                                          | N. A.                                        | N. A.                             |
|                          | Hiyadachitou        | Yamagata        | JRC 45               | landrace          | Japonica          | Hap4                                           | <i>E1/Ghd7-2</i>                             | 78.6                              |
|                          | Fukoku              | Hokkaido        | JRC 46               | landrace          | Japonica          | Hap3                                           | <i>e1-ret/ghd7-0ret</i>                      | N. A.                             |
|                          | Okabo               | Japan (Unknown) | JRC 47               | landrace          | Japonica          | Hap4                                           | <i>E1/Ghd7-2</i>                             | 106.4                             |
|                          | Hakamuri (Yokoyama) | Kagoshima       | JRC 48               | landrace          | Japonica          | Hap4                                           | <i>E1/Ghd7-2</i>                             | 96.0                              |
|                          | Rikutou Rikuu 2     | Japan (Unknown) | JRC 49               | landrace          | Japonica          | N. A.                                          | <i>E1/Ghd7-2</i>                             | 87.7                              |
|                          | Himenomochi         | Akita           | JRC 50               | improved          | Japonica          | Hap2                                           | <i>E1/Ghd7-2</i>                             | 82.8                              |
|                          | Shinshuu            | Nagano          | JRC 51               | landrace          | Japonica          | Hap2                                           | <i>E1/Ghd7-2</i>                             | 85.1                              |
|                          | Aichiasahi          | Aichi           | JRC 52               | improved          | Japonica          | Hap4                                           | <i>E1/Ghd7-2</i>                             | 109.8                             |
|                          | Raiden              | Kantotozan      | JRC 53               | landrace          | Japonica          | Hap4                                           | <i>E1/Ghd7-2</i>                             | 113.7                             |
|                          | Houmanshinden Ine   | Kagoshima       | JRC 54               | landrace          | Japonica          | Hap4                                           | <i>E1/Ghd7-2</i>                             | 120.0                             |

1): ID number of the Japanese core collection

2): N. A. : Not Available data

3): Days to heading is from sowing (April 30, 2010) in Kyoto.

**Table S4. Lists of varieties used in this study**

| Name                      | Origin     | NIAS gene bank ID | landrace/improved | Haplotype around E1 locus | Allele of E1/Ghd7 locus |
|---------------------------|------------|-------------------|-------------------|---------------------------|-------------------------|
| Riku Aikoku               | Kantotozan | 4510              | landrace          | Hap4                      | <i>E1/Ghd7-2</i>        |
| Riku Aikoku               | Kantotozan | 4713              | landrace          | Hap4                      | <i>E1/Ghd7-2</i>        |
| Hakubou Aikoku            | Gunma      | 4774              | landrace          | Hap4                      | <i>E1/Ghd7-2</i>        |
| Aikoku                    | Gunma      | 4982              | landrace          | Hap4                      | <i>E1/Ghd7-2</i>        |
| A Aikoku 2                | Tohoku     | 5247              | improved          | Hap4                      | <i>E1/Ghd7-2</i>        |
| Aikoku                    | Akita      | 5419              | landrace          | Hap5                      | <i>E1/Ghd7-2</i>        |
| Gokuwaseaikoku            | Akita      | 5777              | improved          | Hap4                      | <i>E1/Ghd7-2</i>        |
| Aikokudaikoku             | Akita      | 5792              | improved          | Hap3                      | <i>e1-ret/ghd7-0ret</i> |
| Aikokudaikokumochi A      | Akita      | 5793              | improved          | Hap3                      | <i>e1-ret/ghd7-0ret</i> |
| Aikokudaikokumochi B      | Akita      | 5794              | improved          | Hap4                      | <i>E1/Ghd7-2</i>        |
| Aikokutarehatou           | Akita      | 5795              | improved          | Hap3                      | <i>e1-ret/ghd7-0ret</i> |
| Aikokuwaitou              | Akita      | 5796              | improved          | Hap3                      | <i>e1-ret/ghd7-0ret</i> |
| Aikokumitsuryuutou        | Akita      | 5810              | improved          | Hap3                      | <i>e1-ret/ghd7-0ret</i> |
| Nakatemubouaikoku         | Nagano     | 5998              | improved          | Hap3                      | <i>e1-ret/ghd7-0ret</i> |
| Nakateaikoku 3            | Ibaraki    | 5999              | improved          | Hap3                      | <i>e1-ret/ghd7-0ret</i> |
| Waitouaikoku              | Tohoku     | 6044              | landrace          | Hap3                      | <i>e1-ret/ghd7-0ret</i> |
| Aikokutarehatou           | Tohoku     | 6047              | landrace          | Hap3                      | <i>e1-ret/ghd7-0ret</i> |
| Bouzuaikoku               | Yamagata   | 6133              | landrace          | Hap3                      | <i>e1-ret/ghd7-0ret</i> |
| Rikuuaiikoku 20           | Akita      | 6158              | improved          | Hap3                      | <i>e1-ret/ghd7-0ret</i> |
| Aikoku                    | Fukui      | 6365              | landrace          | Hap3                      | <i>e1-ret/ghd7-0ret</i> |
| Aikoku                    | Fukui      | 6369              | landrace          | Hap3                      | <i>e1-ret/ghd7-0ret</i> |
| Aikoku 70                 | Niigata    | 6442              | improved          | Hap3                      | <i>e1-ret/ghd7-0ret</i> |
| Aikoku                    | Miyagi     | 6730              | landrace          | Hap3                      | <i>e1-ret/ghd7-0ret</i> |
| Nakateaikoku              | Yamagata   | 6744              | improved          | Hap3                      | <i>e1-ret/ghd7-0ret</i> |
| Nakateshinaikoku          | Akita      | 6752              | improved          | Hap3                      | <i>e1-ret/ghd7-0ret</i> |
| Waseaikoku                | Yamagata   | 6753              | landrace          | Hap5                      | <i>E1/Ghd7-2</i>        |
| Aikoku 1                  | Miyagi     | 6757              | improved          | Hap4                      | <i>E1/Ghd7-2</i>        |
| Aikoku                    | Miyagi     | 6768              | landrace          | Hap3                      | <i>e1-ret/ghd7-0ret</i> |
| Aikokuibaraki 1           | Ibaraki    | 6771              | improved          | Hap3                      | <i>e1-ret/ghd7-0ret</i> |
| Aikokuibaraki 2           | Ibaraki    | 6822              | improved          | Hap3                      | <i>e1-ret/ghd7-0ret</i> |
| Akitawaseaikoku 5         | Akita      | 6915              | improved          | Hap4                      | <i>E1/Ghd7-2</i>        |
| Waseaikoku                | Miyagi     | 6927              | improved          | Hap3                      | <i>e1-ret/ghd7-0ret</i> |
| Waseaikoku 2              | Miyagi     | 6928              | improved          | Hap3                      | <i>e1-ret/ghd7-0ret</i> |
| Aikokuho                  | Miyagi     | 7013              | landrace          | Hap3                      | <i>e1-ret/ghd7-0ret</i> |
| Kairyuaikoku 17           | Osaka      | 7053              | improved          | Hap4                      | <i>E1/Ghd7-2</i>        |
| Waseaikoku 96             | Chiba      | 7054              | improved          | Hap3                      | <i>e1-ret/ghd7-0ret</i> |
| Nakateaikoku 90           | Chiba      | 7055              | improved          | Hap3                      | <i>e1-ret/ghd7-0ret</i> |
| Toukyoumubouaikoku        | Tokyo      | 7058              | landrace          | Hap3                      | <i>e1-ret/ghd7-0ret</i> |
| Aikoku 3                  | Tochigi    | 7084              | improved          | Hap3                      | <i>e1-ret/ghd7-0ret</i> |
| Aikokusai 1               | Saitama    | 7085              | improved          | Hap3                      | <i>e1-ret/ghd7-0ret</i> |
| Aikoku 20                 | Akita      | 7095              | improved          | Hap4                      | <i>E1/Ghd7-2</i>        |
| Aikoku 6                  | Gunma      | 7096              | improved          | Hap3                      | <i>e1-ret/ghd7-0ret</i> |
| Waseaikoku 30             | Gunma      | 7097              | improved          | Hap3                      | <i>e1-ret/ghd7-0ret</i> |
| Shizuokaikoku 1           | Shizuoka   | 7189              | improved          | Hap3                      | <i>e1-ret/ghd7-0ret</i> |
| Aikoku 5                  | Fukushima  | 7198              | improved          | Hap3                      | <i>e1-ret/ghd7-0ret</i> |
| A Aikoku 1                | Miyagi     | 7228              | improved          | Hap2                      | <i>E1/Ghd7-2</i>        |
| Aikoku 3                  | Tochigi    | 7332              | improved          | Hap3                      | <i>e1-ret/ghd7-0ret</i> |
| Aikoku A                  | Kanagawa   | 7556              | landrace          | Hap4                      | <i>E1/Ghd7-2</i>        |
| Choubouaikoku             | Kantotozan | 7560              | landrace          | Hap2                      | <i>E1/Ghd7-2</i>        |
| Shinkane/Aikoku           | Kanagawa   | 7576              | improved          | Hap2                      | <i>E1/Ghd7-2</i>        |
| Kairyuaikokudaikokugata 1 | Miyagi     | 7621              | improved          | Hap3                      | <i>e1-ret/ghd7-0ret</i> |

|                           |            |       |          |      |                         |
|---------------------------|------------|-------|----------|------|-------------------------|
| Kairyuaikokudaikokugata 2 | Miyagi     | 7622  | improved | Hap3 | <i>e1-ret/ghd7-0ret</i> |
| Banaikoku                 | Gifu       | 9192  | landrace | Hap4 | <i>E1/Ghd7-2</i>        |
| Aikoku 68                 | Mie        | 9277  | improved | Hap3 | <i>e1-ret/ghd7-0ret</i> |
| Aikoku 1 (Kyouto)         | Kyoto      | 9285  | improved | Hap3 | <i>e1-ret/ghd7-0ret</i> |
| Aikoku                    | Shiga      | 9310  | landrace | Hap3 | <i>e1-ret/ghd7-0ret</i> |
| Aikokumochi               | Mie        | 9412  | landrace | Hap4 | <i>E1/Ghd7-2</i>        |
| Aikoku B                  | Osaka      | 9513  | improved | Hap3 | <i>e1-ret/ghd7-0ret</i> |
| Aikoku C                  | Osaka      | 9514  | improved | Hap3 | <i>e1-ret/ghd7-0ret</i> |
| Aikoku D                  | Osaka      | 9515  | improved | Hap3 | <i>e1-ret/ghd7-0ret</i> |
| Aikoku F                  | Osaka      | 9516  | improved | Hap2 | <i>E1/Ghd7-2</i>        |
| Aikoku G                  | Osaka      | 9517  | improved | Hap3 | <i>e1-ret/ghd7-0ret</i> |
| Aikoku                    | Tokushima  | 9650  | landrace | Hap3 | <i>e1-ret/ghd7-0ret</i> |
| Aikoku 1                  | Shimane    | 9823  | improved | Hap3 | <i>e1-ret/ghd7-0ret</i> |
| Aikoku 2                  | Shimane    | 9824  | improved | Hap3 | <i>e1-ret/ghd7-0ret</i> |
| Aikoku                    | Kantotozan | 10993 | landrace | Hap4 | <i>E1/Ghd7-2</i>        |
| Aikoku (4X)               | Fukuoka    | 10994 | improved | Hap4 | <i>E1/Ghd7-2</i>        |
| Mubouaikoku               | Ibaraki    | 14931 | landrace | Hap3 | <i>e1-ret/ghd7-0ret</i> |
| Kairyuaikoku              | Osaka      | 15007 | improved | Hap2 | <i>E1/Ghd7-2</i>        |
| Waseaikoku 3              | Kanagawa   | 15051 | landrace | Hap3 | <i>e1-ret/ghd7-0ret</i> |
| W (Waseaikoku)            | Akita      | 37731 | unknown  | Hap3 | <i>e1-ret/ghd7-0ret</i> |

---

**Table S5. Primer and probe sequences and probes ID for quantitative RT-PCR**

| Gene             | Forward sequence   | Reverse sequence   | product size | catalog number of probe <sup>1)</sup> | probe sequence |
|------------------|--------------------|--------------------|--------------|---------------------------------------|----------------|
| <i>Ghd7</i>      | GAGGGAGGCAAGCTGAT  | ACCGATTGCTTCTCGTAG | 68           | #35 468768001                         | agaagagga      |
| <i>Ubiquitin</i> | CTCCGTGGCGGTATCATC | TCTTCTGCGGCAGTTGAC | 124          | #124 4693582001                       | no data        |

<sup>1)</sup> The catalog number of probe is based on the Universal Probe Library designed with ProbeFinder version 2.45 (Roche; <https://www.roche-applied-science.com/>).



**Table S6. Primers used for haplotype analysis**

| Name of primers | Forward primer       | Reverse primer             | annealing temperture (°C) | Product size (bp) | SNP               | Enzyme <sup>1)</sup> |
|-----------------|----------------------|----------------------------|---------------------------|-------------------|-------------------|----------------------|
| Haplotype_INDEL | CCCCCAAACATTTTCAGAAC | CTGCACCTAATCCGAATTCA       | 55                        | 234 <sup>2)</sup> | -                 | -                    |
| Haplotype_SNP1  | ATGTCATGCGGTGGGATTG  | CCGAAGGCCAAACTAGGAAG       | 62                        | 623               | G/T <sup>3)</sup> | Hpy188I              |
| Haplotype_SNP2  | GCTTGAAGATTGGGAGCTTG | CACTAGAAGGAGTTCACCTTTTCTTC | 55                        | 295               | C/T <sup>3)</sup> | Hpy188I              |

<sup>1)</sup> Enzyme is used in CAPS marker analysis.

<sup>2)</sup> The number indicates PCR product size without the 20bp deletion.

<sup>3)</sup> The nucleotides indicate the Nipponbare and EG5 genome sequence (left) and Kirara397 genome sequence (right).
